# Supplementary material for: Simultaneously enhanced Jsc and FF by employing two solution-processed interfacial layers for inverted planar perovskite solar cells
Source: Royal Society of Chemistry journal article supplement (doi:10.1039/c7ra07475a), 2017-01-01
Supplement: c7ra07475a1.pdf [file c7ra07475a1.pdf]

## Supporting information

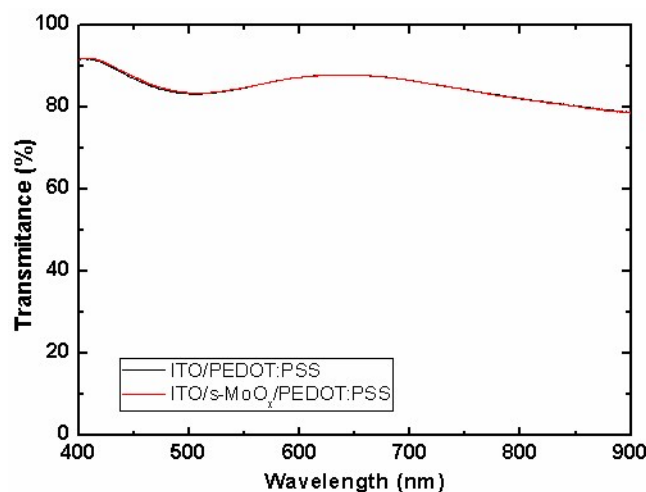

**Figure S1.** The transmittance of the substrate of ITO/PEDOT:PSS and ITO/s-MoO<sub>x</sub>/PEDOT:PSS.

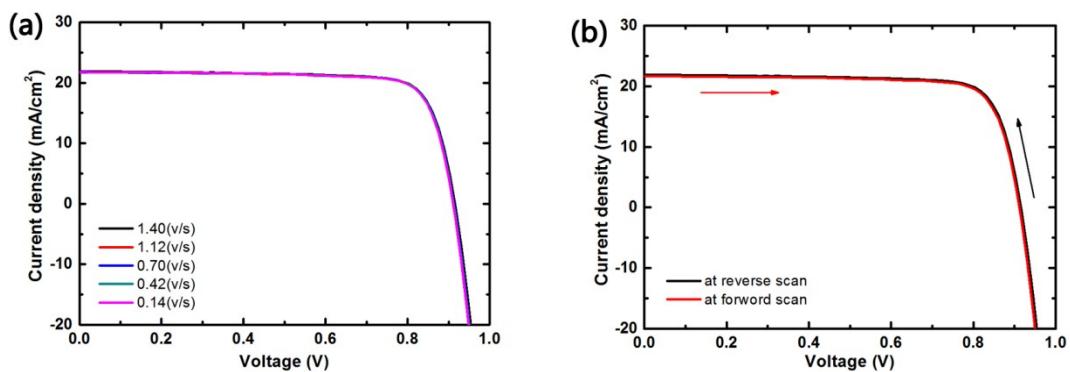

**Figure S2. J-V hysteresis.** J–V curves for the optimized perovskite solar cell of ITO/s-MoO<sub>x</sub>/PEDOT/perovskite/PCBM/TOPD/Ag with different scan rate (a) and with different scan direction (b).

**Table S1.** The photovoltaic parameters of the 28 device A and device C respectively.

| Device #A | $V_{oc}$ | $J_{sc}$ | $FF$  | $PCE$ |
|-----------|----------|----------|-------|-------|
| 1         | 0.88     | 18.17    | 69.59 | 11.13 |
| 2         | 0.91     | 16.46    | 68.37 | 10.22 |
| 3         | 0.885    | 17.51    | 69.67 | 10.80 |
| 4         | 0.903    | 18.95    | 66.75 | 11.42 |
| 5         | 0.89     | 19.23    | 70.77 | 12.11 |
| 6         | 0.88     | 18.3     | 69.2  | 11.14 |
| 7         | 0.88     | 17.16    | 67.59 | 10.19 |
| 8         | 0.876    | 15.86    | 67.66 | 9.39  |
| 9         | 0.87     | 16.12    | 66.8  | 9.38  |
| 10        | 0.87     | 17.97    | 67.76 | 10.59 |
| 11        | 0.884    | 18.52    | 67.55 | 11.06 |
| 12        | 0.88     | 16.34    | 67.73 | 9.73  |
| 13        | 0.89     | 18.08    | 66.77 | 10.77 |
| 14        | 0.88     | 17.82    | 69.93 | 11.00 |
| 15        | 0.89     | 16.46    | 70.28 | 10.29 |
| 16        | 0.91     | 16.57    | 70.7  | 10.71 |
| 17        | 0.91     | 16.23    | 71.62 | 10.59 |
| 18        | 0.89     | 18.08    | 66.77 | 10.77 |
| 19        | 0.906    | 17.11    | 69.73 | 10.81 |
| 20        | 0.91     | 18.82    | 67.44 | 11.53 |
| 21        | 0.91     | 19.68    | 66.01 | 11.82 |
| 22        | 0.903    | 17.54    | 67.6  | 10.7  |
| 23        | 0.874    | 17.62    | 67.73 | 10.43 |
| 24        | 0.864    | 18.01    | 69.51 | 10.81 |
| 25        | 0.875    | 17.21    | 68.68 | 10.34 |
| 26        | 0.889    | 18.88    | 67.98 | 11.41 |
| 27        | 0.89     | 17.27    | 70.69 | 10.88 |
| 28        | 0.89     | 17.2     | 70.22 | 10.73 |

  

| Device #C | $V_{oc}$ | $J_{sc}$ | $FF$  | $PCE$ |
|-----------|----------|----------|-------|-------|
| 1         | 0.907    | 19.98    | 78.41 | 14.21 |
| 2         | 0.91     | 19.996   | 78.05 | 14.01 |
| 3         | 0.903    | 19.5     | 76.3  | 13.43 |
| 4         | 0.904    | 20.66    | 75.13 | 14.03 |
| 5         | 0.891    | 21.7     | 79.15 | 15.3  |
| 6         | 0.89     | 20.84    | 78.59 | 14.58 |
| 7         | 0.914    | 21.75    | 80.7  | 16.04 |
| 8         | 0.91     | 20.74    | 75.27 | 14.21 |
| 9         | 0.91     | 20.68    | 76.1  | 14.31 |
| 10        | 0.88     | 20.69    | 78.69 | 14.33 |
| 11        | 0.907    | 20.54    | 75.77 | 14.11 |
| 12        | 0.89     | 20.16    | 79.97 | 14.28 |
| 13        | 0.89     | 21.28    | 76.67 | 14.51 |

---

|    |       |       |       |       |
|----|-------|-------|-------|-------|
| 14 | 0.901 | 19.41 | 76.44 | 13.37 |
| 15 | 0.905 | 19.46 | 76.48 | 13.47 |
| 16 | 0.89  | 20.53 | 78.36 | 14.22 |
| 17 | 0.90  | 18.76 | 77.63 | 13.05 |
| 18 | 0.90  | 20.97 | 77.2  | 14.40 |
| 19 | 0.88  | 22.16 | 79.94 | 15.62 |
| 20 | 0.89  | 21.73 | 79.51 | 15.38 |
| 21 | 0.88  | 21.89 | 77.65 | 14.96 |
| 22 | 0.914 | 20.62 | 78.24 | 14.74 |
| 23 | 0.91  | 22.02 | 74.80 | 14.98 |
| 24 | 0.88  | 22.03 | 76.35 | 14.8  |
| 25 | 0.904 | 19.45 | 77.21 | 13.58 |
| 26 | 0.92  | 21.5  | 78.21 | 15.46 |
| 27 | 0.913 | 21.12 | 80.32 | 15.48 |
| 28 | 0.905 | 22.5  | 75.02 | 15.27 |

---
